# Supplementary material for: Mycobacterium tuberculosis IMPDH in Complexes with Substrates, Products and Antitubercular Compounds
Source: PLoS One. 2015 Oct 6;10(10):e0138976. doi: 10.1371/journal.pone.0138976 (PMC4594927; doi:10.1371/journal.pone.0138976)
Supplement: S1 Table — All values are the average of at least two determinations unless otherwise noted. a. Data from [24]. b. Data from [23]. c. Data from [37]. d. Single determination. (DOCX) [file pone.0138976.s006.docx]

**S1 Table. Structures of inactive A series amide derivatives.** All values are the average of at least two determinations unless otherwise noted. a.Data from [24]. b. Data from [24]. c. Data from [37]. d. Single determination.

|  | | | | | |
| --- | --- | --- | --- | --- | --- |
| **Cmpd** | **R1** | **X** | **R2** | ***Ki,app* (nM)** | |
| ***Cp*IMPDH** a | ***Ba*IMPDH** c |
| **A50** | Me | CH | 4-Cl | 1000 ± 100 a | 150 ± 30c |
| **A61** | Me | CH | 4-Br | 161 ± 86 b | 165 ± 75c |
| **A64** | Me | CH | 4-CF3 | 1500 ± 700 b | 650 ± 180 |
| **A67** | Me | N | 4-Cl | 660 ± 200 a | 1000 ± 80c |
| **A68** | *i*-Pr | CH | 4-Br | 400 ± 200 b | 138 d |
| **A72** | *c*-Pr | CH | 4-Cl | > 5000 a | 160 ± 55c |
